# Supplementary material for: Exploring the Remarkable Diversity of Culturable Escherichia coli Phages in the Danish Wastewater Environment
Source: MDPI journal article supplement (doi:10.3390/v12090986), 2020-09-04
Supplement: s1 [file s1]

## Supplementary data:

# Exploring the Remarkable Diversity of *Escherichia coli* Phages in the Danish Wastewater Environment, Including 92 Novel Phage Species

## Figures:

- S1 VIRIDIC Plot of intergenomic sequence similarity, aligned genome fraction and genome length ratio for the 104 coliphage species
- S2 Distribution of the 136 coliphage species per WWTP location (urban vs rural)
- S3 Phylogenetic and -genomic analyses of the six *Microviridae* coliphages
- S4 Phylogenomic nucleotide distances (Gegenees, BLASTn) for the *Hanrivervirus* coliphages
- S5 Phylogenomic nucleotide distances (Gegenees, BLASTn) for phage Halfdan
- S6 Phylogenetic and -genomic analyses of the *Bonnellvirus* coliphages
- S7 Phylogenomic nucleotide distances (Gegenees, BLASTn) for the *Podoviridae* coliphages
- S8 Mapped reads from the Wang *et al.* (2019) study to the genomes of flopper and Lilleven
- S9 Alignment coverage distribution of IMG/VR iVGs to the 104 coliphage genomes and significative hits to these

## Tables:

- S1 List of phages per wastewater sample and corresponding sequence metrics
- S2 AMG screening results
- S3 Species richness estimations
- S4 Read mapping results for samples with *Microviridae*
- S5 List of sequence data assessed for matches with the 104 coliphage genomes
- S6 Mapped reads from the Wang *et al.* (2019) study and the IMG/VR microbiomes, separate file: Table\_S6.xlsx
- S7 IMG/VR and GVD blast results, separate file: Table\_S7.xlsx

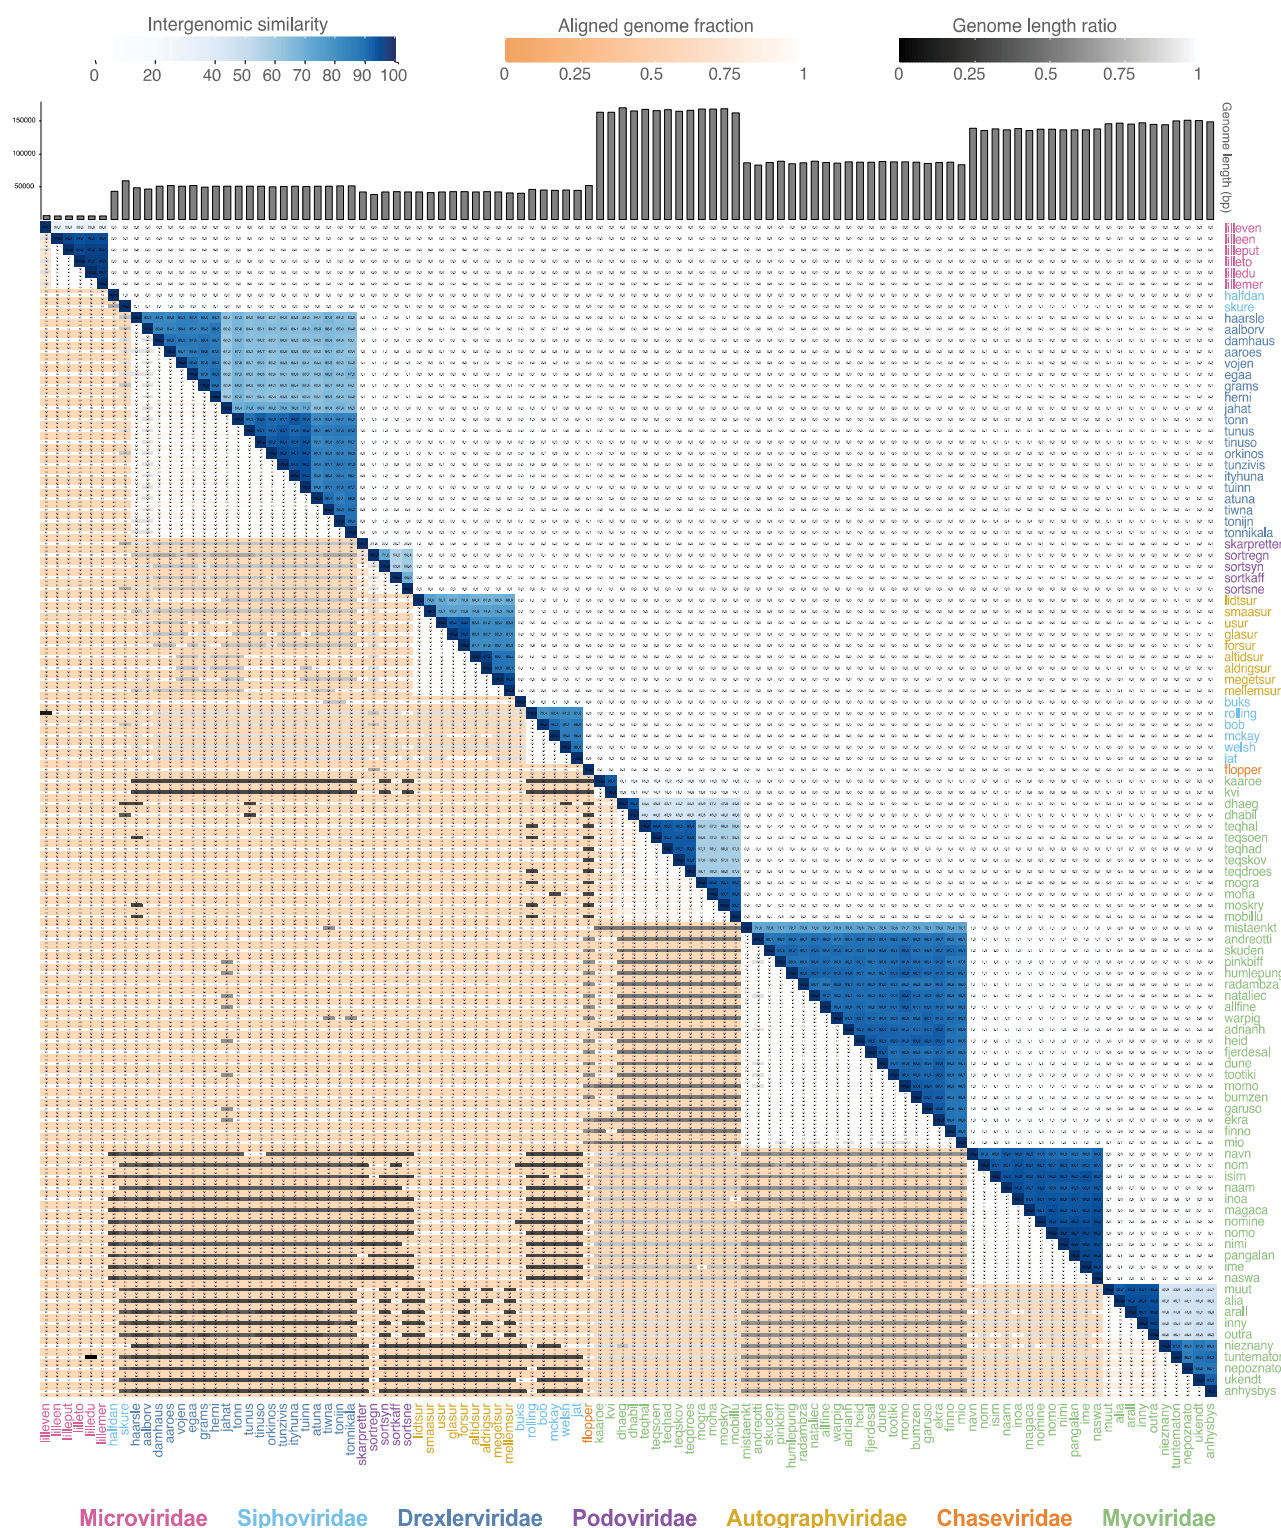

**Figure S1** VIRIDIC plot of intergenomic sequence similarity, aligned genome fraction and genome length ratio for the 104 coliphage species. Genome length is not calculated (NA) when the intergenomic similarity is zero.

**A**

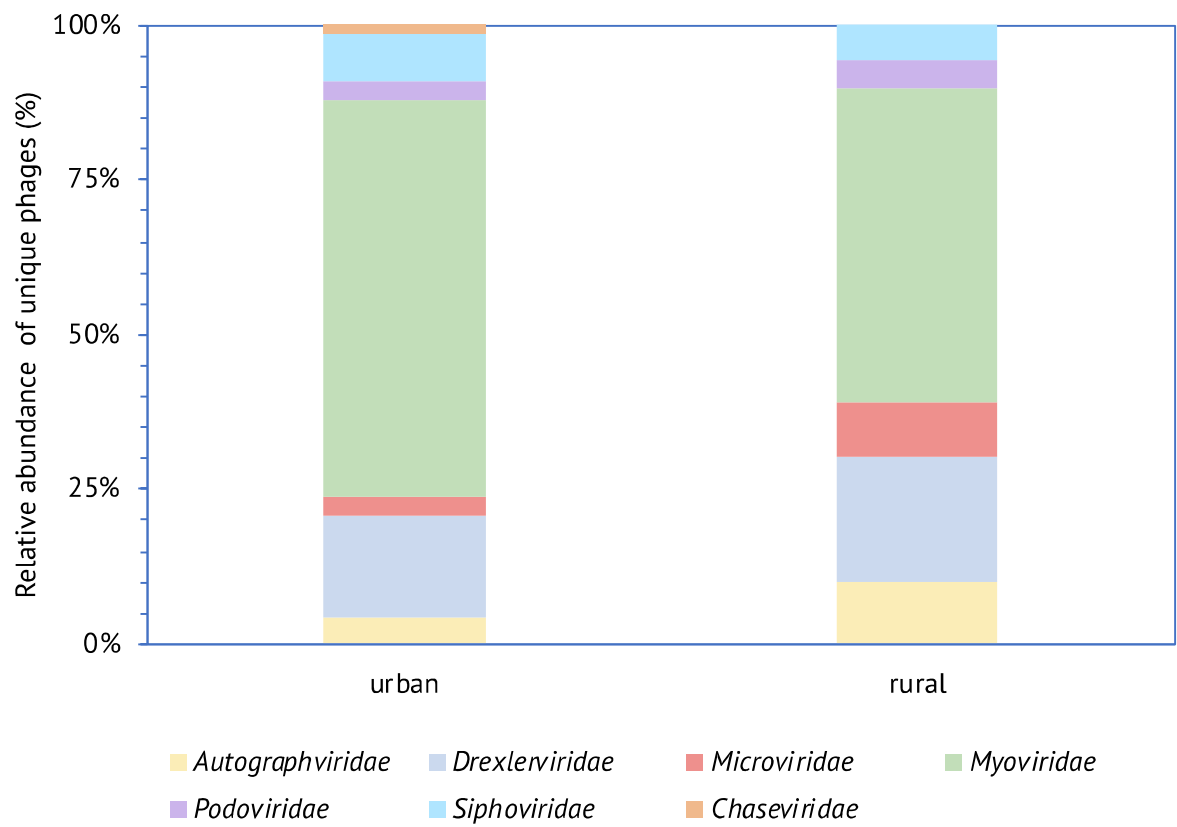

**B**

|       | Myoviridae | Drexlerviridae | Autographviridae | Siphoviridae | Microviridae | Podoviridae | Chaseviridae | total phages |
|-------|------------|----------------|------------------|--------------|--------------|-------------|--------------|--------------|
| urban | 43         | 14             | 3                | 5            | 2            | 2           | 1            | 70           |
| rural | 35         | 11             | 7                | 4            | 6            | 3           | 0            | 66           |

**Figure S2** Distribution of the 136 unique phage species grouped by family per wastewater treatment plant location; urban (n = 22) or rural (n = 22). **A** as relative abundance per location type. **B** as true counts.

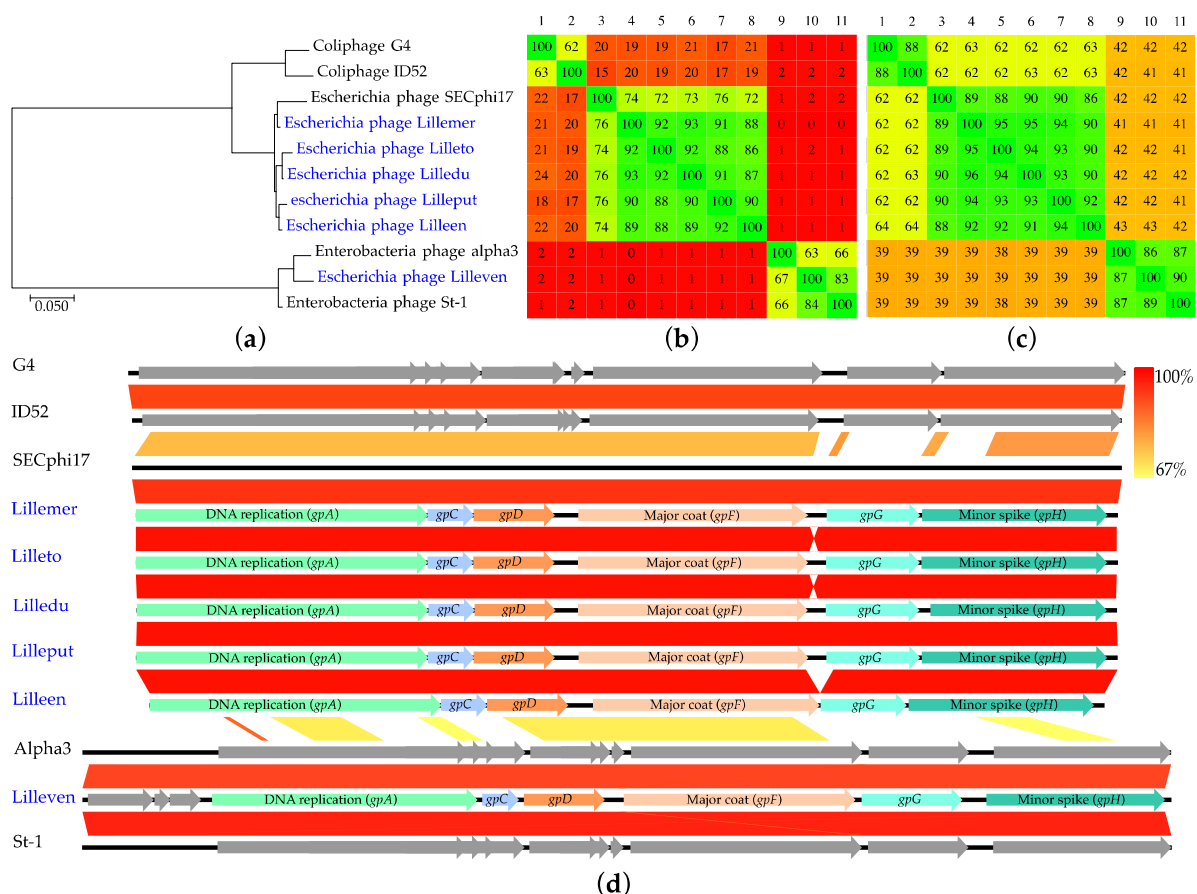

**Figure S3** Phylogenetic and -genomic analyses of the *Microviridae* coliphages and closest relatives. **A** Phylogenetic tree (Maximum log likelihood: -6065.3, DNA replication protein gene *gpA*), scalebar: substitutions per site. **B** phylogenomic nucleotide distances (Gegenees, BLASTn: fragment size: 200, step size: 100, threshold: 0%). **C** phylogenomic amino acid distances (Gegenees, BLASTx: fragment size: 200, step size: 100, threshold: 0%). **D** Pairwise genomic alignments (Easyfig, BLASTn), colour bars between genomes indicate present nucleotide similarity, genomes have been modified to have similar starting points. Blue font denotes phages isolated in this study.

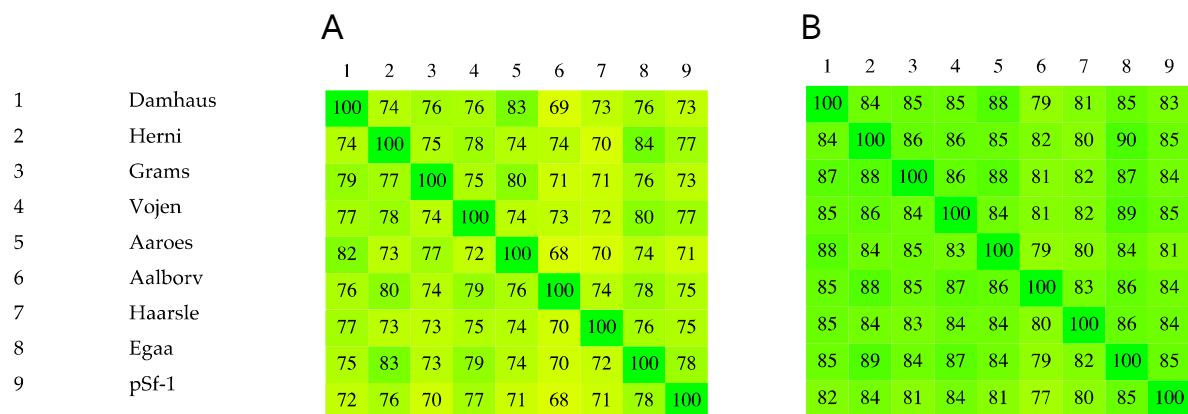

**Figure S4** Phylogenomic nucleotide distances for the *Hanrivirvirus* coliphages and type species pSf-1. **A** (Gegenees, BLASTn: fragment size: 200, step size: 100, threshold: 0%). **B** phylogenomic amino acid distances (Gegenees, BLASTx: fragment size: 200, step size: 100, threshold: 0%).

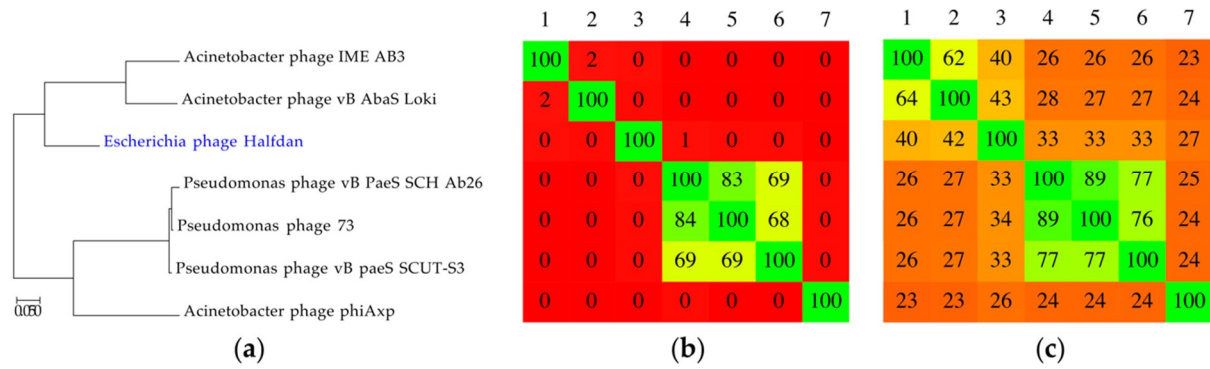

**Figure S5** Phylogenetic and -genomic analyses of the *Siphoviridae* Halfdan and closest relatives. Blue font denotes phages isolated in this study. **A** Phylogenetic tree (Maximum log likelihood: -7678.71, large terminase subunit gene *TerL*), scalebar: substitutions per site. **B** phylogenomic nucleotide distances (Gegenees, BLASTn: fragment size: 200, step size: 100, threshold: 0%). **C** phylogenomic amino acid distances (Gegenees, BLASTx: fragment size: 200, step size: 100, threshold: 0%).

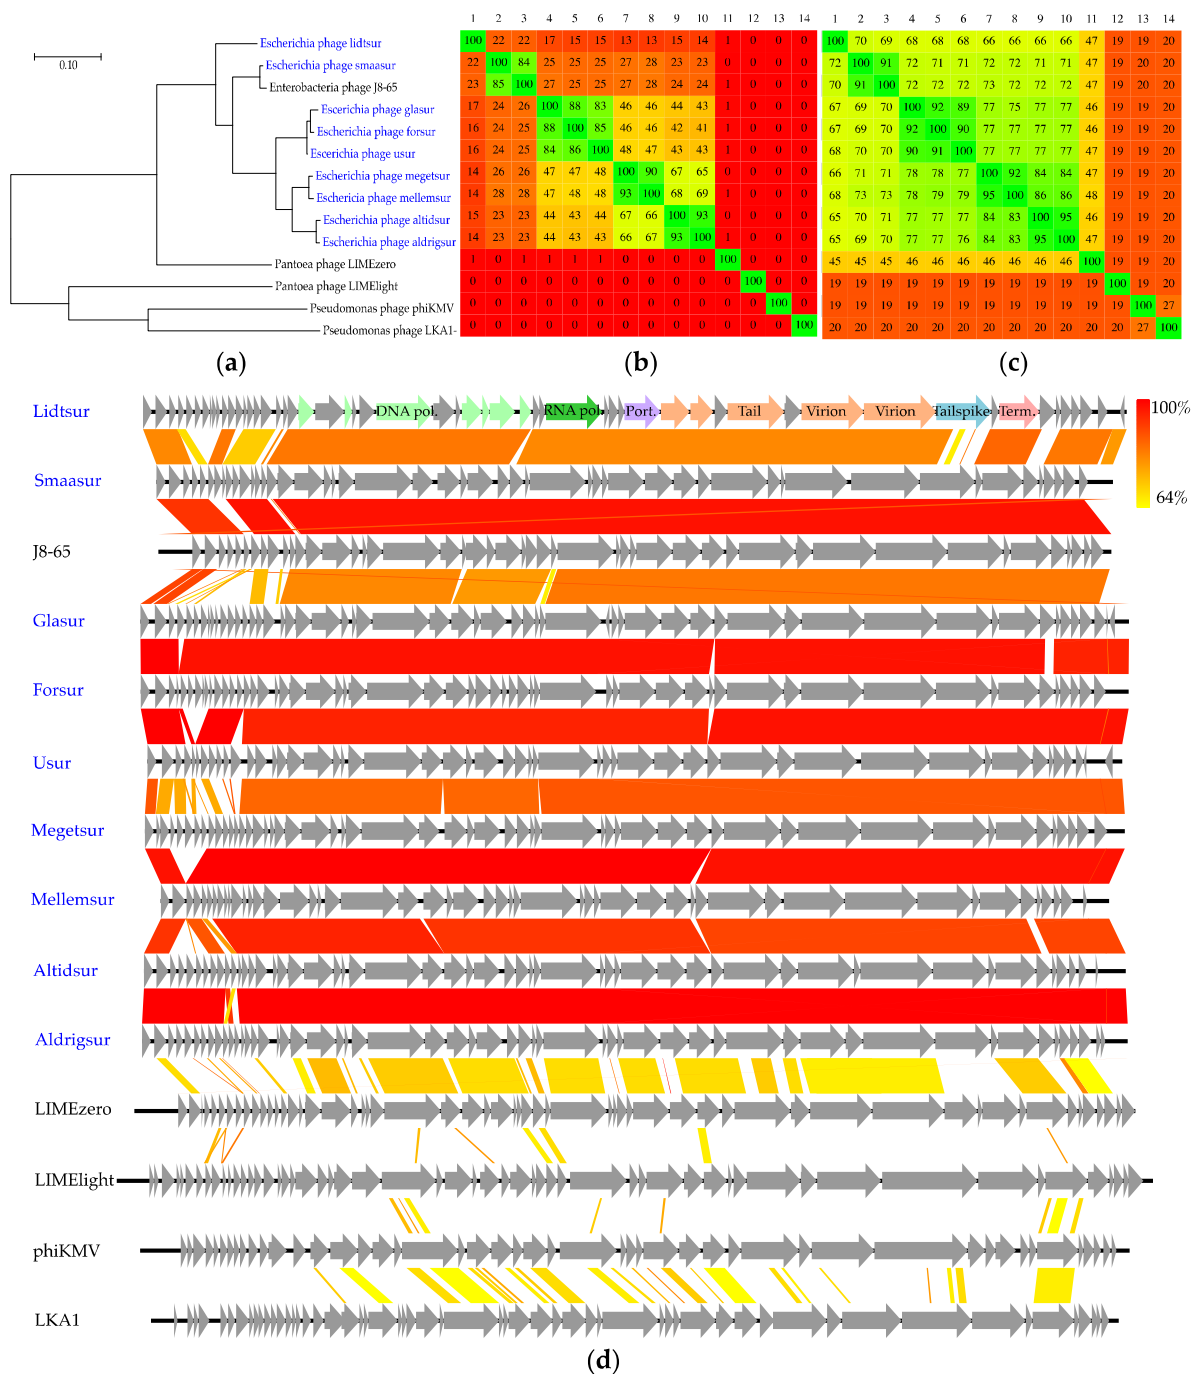

**Figure S6** Phylogenetic and -genomic analyses of the *Bonellivirus* coliphages and closest relatives. **A** Phylogenetic tree (Maximum log Likelihood: -11728.26, large terminase subunit), scalebar: substitutions per site. **B** Phylogenomic nucleotide distances (Gegenees, BLASTn: fragment size: 200, step size: 100, threshold: 0%). **C** Phylogenomic amino acid distances (Gegenees, tBLASTx: fragment size: 200, and step size: 100, threshold: 0%). **D** Pairwise alignment of phage genomes (Easyfig, BLASTn), the colour bars between genomes indicate percent pairwise similarity. Genomes have been modified to have similar starting points. Blue font denotes phages isolated in this study.

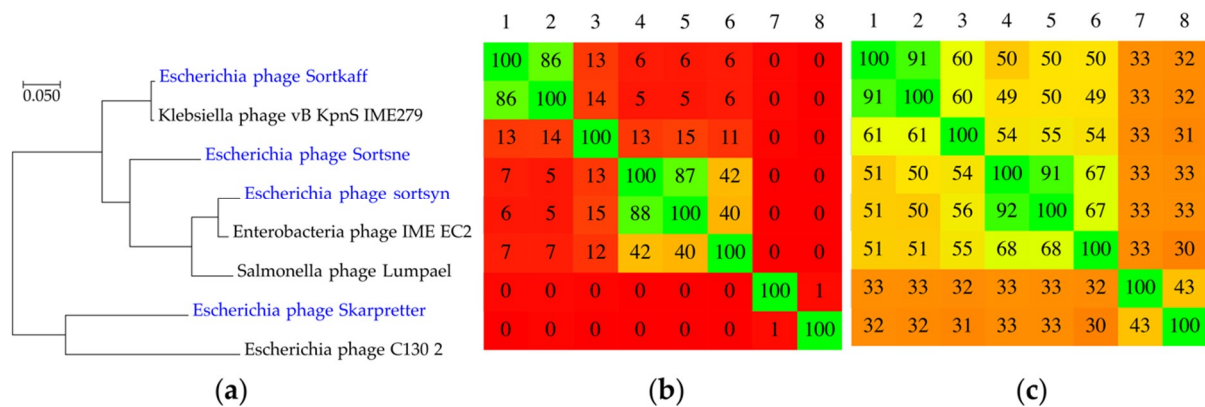

**Figure S7** Phylogenetic and -genomic analyses of the *Podoviridae* coliphages and closest relatives. Blue font denotes phages isolated in this study. **A** Phylogenetic tree (Maximum log likelihood: -8023.43, large terminase subunit gene *TerL*), scalebar: substitutions per site. **B** phylogenomic nucleotide distances (Gegenees, BLASTn: fragment size: 200, step size: 100, threshold: 0%). **C** phylogenomic amino acid distances (Gegenees, BLASTx: fragment size: 200, step size: 100, threshold: 0%).





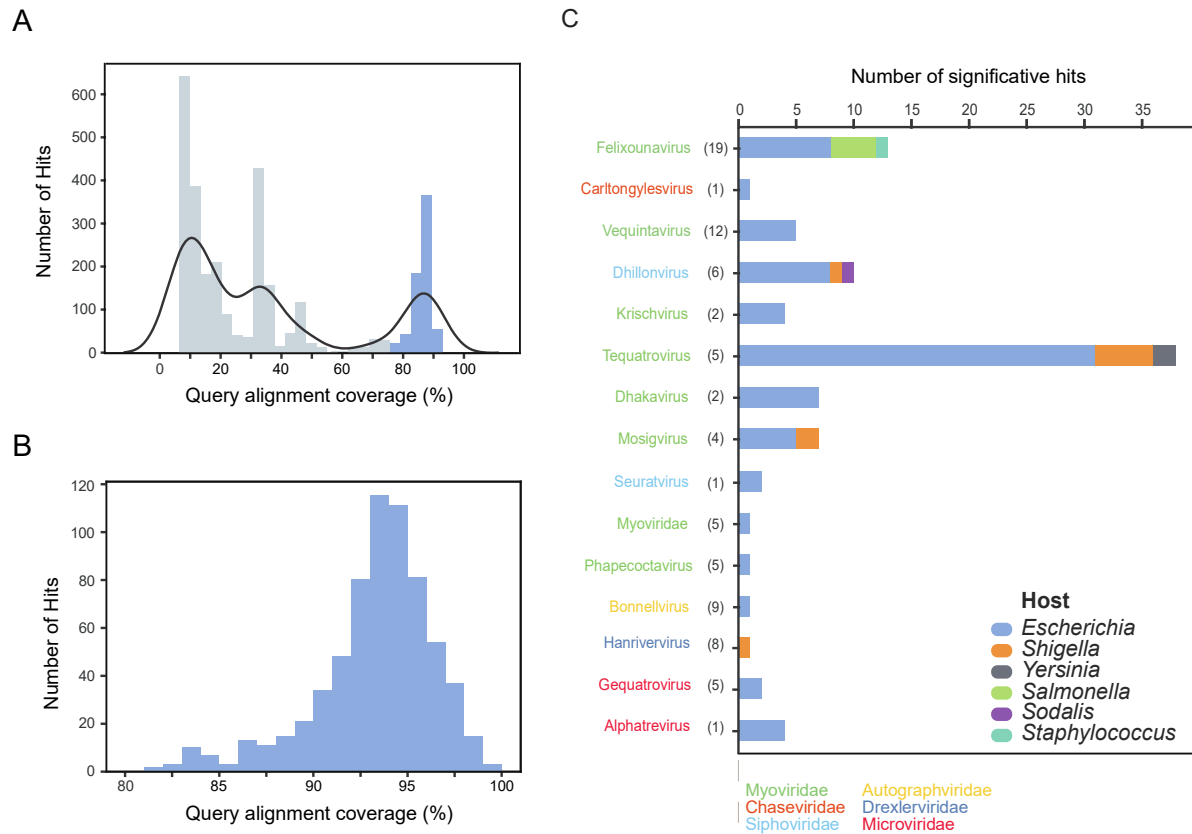

**Figure 9** **A** Blast query sequence coverage distribution of BLASTn searches of coliphages against a database of the Integrated Microbial Genomes/Virus IMG/VR and Gut Virome Database (GVD) sequences. Significant hits per coliphage sequence covering  $\geq 80\%$  of coliphage genomes are shown in blue. **B** A close-up of blast query coverage distribution hits  $\geq 80\%$  **C** Significant hits ( $>80\%$  query coverage) counts per coliphage taxonomic group against iVGs sequences from the IMG/VR databases. Each bar represents the matches to individual coliphage groups and are color-coded according to taxonomic family. The number of phages within each group is written within parentheses.

**Table S1** List of positive samples (n = 96) and phages isolated from these with corresponding sequence metrics i.e. contigs, reads and assembled phage genome per sample (n = 104), as well as coverage per genome assembly.

| Sample | Location     | Contigs | Reads   | Phages (n) | Phage <sup>a</sup> | Coverage (x) |
|--------|--------------|---------|---------|------------|--------------------|--------------|
| 1A     | Billund      | 4       | 72371   | 1          | buks               | 256          |
| 1B     | Billund      | 187     | 407029  | 2          | dhabil             | 253          |
|        |              |         |         |            | mobillu            | 46           |
| 2A     | Grindsted    | 270     | 306434  | 1          | pangalan           | 262          |
| 3A     | Avedøre      | 1963    | 294281  | 1          | fjerdesal-like     | 302          |
| 3D     | Avedøre      | 4254    | 386918  | 1          | tootiki            | 368          |
| 4B     | Damhusåen    | 6157    | 481628  | 1          | damhus             | 56           |
| 6A     | Kolding      | 3986    | 168057  | 1          | mistaenkt          | 112          |
| 7B     | Esbjerg Vest | 1721    | 508938  | 2          | tuntematon         | 438          |
|        |              |         |         |            | atuna              | 52           |
| 7C     | Esbjerg Vest | 2       | 368607  | 1          | tuntematon-like    | 345          |
| 8C     | Esbjerg øst  | 4129    | 242842  | 2          | heid-like          | 272          |
|        |              |         |         |            | tonn-like          | 22           |
| 10D    | Skovlund     | 336     | 281474  | 1          | teqskov            | 184          |
| 11B    | Varde        | 6570    | 378556  | 2          | sortsyn            | 213          |
|        |              |         |         |            | Lilleven           | 701          |
| 11C    | Varde        | 1164    | 118310  | 2          | nimi               | 51           |
|        |              |         |         |            | smaasur            | 28           |
| 12B    | Drøbro       | 4443    | 255665  | 1          | humlepung-like     | 290          |
| 12C    | Drøbro       | 455     | 147560  | 2          | bob                | 43           |
|        |              |         |         |            | ime-like           | 116          |
| 12D    | Drøbro       | 4691    | 361420  | 2          | Lilleput           | 254          |
|        |              |         |         |            | teqdros            | 192          |
| 13B    | Hadsten      | 724     | 201166  | 1          | mckay              | 385          |
| 13C    | Hadsten      | 2466    | 257350  | 1          | mio                | 398          |
| 13D    | Hadsten      | 294     | 78995   | 1          | alia               | 22           |
| 14A    | Hammel       | 2495    | 140257  | 2          | allfine            | 114          |
|        |              |         |         |            | tinuso             | 81           |
| 14B    | Hammel       | 424     | 75810   | 1          | bumzen-like        | 53           |
| 14D    | Hammel       |         |         | 1          | bumzem-like        | 22           |
| 15A    | Hinnerup     | 4320    | 368108  | 2          | bumzen             | 459          |
|        |              |         |         |            | Skarpretter        | 20           |
| 19C    | Tørring      | 3833    | 264373  | 1          | dune               | 220          |
| 19D    | Tørring      | 37      | 105090  | 1          | nepoznato-like     | 58           |
| 20A    | Helsingør    | 744     | 143289  | 2          | warpig             | 92           |
|        |              |         |         |            | tunus              | 29           |
| 20D    | Helsingør    | 5180    | 2064920 | 1          | radambza           | 1280         |
| 21B    | Herning      | 5829    | 2405937 | 3          | navn               | 141          |
|        |              |         |         |            | tiwna              | 438          |
|        |              |         |         |            | herni              | 196          |
| 21C    | Herning      | 4208    | 772492  | 1          | ekra               | 667          |
| 22A    | Hillerød     | 224     | 210802  | 1          | outra              | 127          |
| 22C    | Hillerød     | 137     | 122673  | 1          | anhysbys           | 97           |
| 23A    | Lemvig       | 864     | 233926  | 2          | welsh-like         | 64           |
|        |              |         |         |            | nomine             | 255          |
| 23C    | Lemvig       | 5948    | 390078  | 2          | jat                | 193          |
|        |              |         |         |            | Skure              | 226          |
| 24B    | Bevtoft      | 4010    | 230626  | 1          | heid-like          | 667          |
| 24C    | Bevtoft      | 5548    | 595967  | 1          | heid-like          | 667          |
| 25B    | Gram         | 2314    | 950865  | 2          | humlepung          | 998          |
|        |              |         |         |            | grams              | 121          |
| 25C    | Gram         | 160     | 503468  | 2          | mogra              | 310          |
|        |              |         |         |            | Lilledu            | 67           |
| 26A    | Haderslev    | 3       | 203554  | 1          | moha               | 99           |
| 26B    | Haderslev    | 24      | 184597  | 1          | teqhad             | 114          |
| 27A    | Halk         | 2481    | 457114  | 2          | teqhal-like        | 236          |

|     |              |      |         |   |                |       |
|-----|--------------|------|---------|---|----------------|-------|
|     | Halk         |      |         |   | usur-like      | 101   |
| 27D | Halk         | 1741 | 3069013 | 2 | usur           | 378   |
| 27D | Halk         |      |         |   | teqhal         | 1234  |
| 28D | Jegerup      | 36   | 55099   | 1 | nom            | 30    |
| 29A | Nustrup      | 539  | 116036  | 1 | garuso-like    | 53    |
| 29D | Nustrup      | 39   | 20948   | 1 | rolling        | 31    |
| 30B | Over Jerstal | 74   | 29055   | 2 | orkinos        | 49    |
| 30B | Over Jerstal |      |         |   | Lidtsur        | 20    |
| 30D | Over Jerstal | 5355 | 646801  | 2 | herni-like     | 159   |
|     |              |      |         |   | orkinos-like   | 650   |
| 31B | Skovby       | 6327 | 2572603 | 2 | isim           | 30    |
| 31B | Skovby       |      |         |   | megetsur       | 89    |
| 31C | Skovby       | 5698 | 641691  | 1 | finno          | 114   |
| 31D | Skovby       | 1334 | 198073  | 1 | naam           | 44    |
| 32B | Skrydstrup   | 513  | 141211  | 1 | tonijn-like    | 179   |
| 32C | Skrydstrup   | 1564 | 259226  | 2 | tonijn         | 245   |
|     |              |      |         |   | moskry         | 63    |
| 32D | Skrydstrup   |      |         | 1 | ukendt         | 438   |
| 33A | Sommersted   | 443  | 121856  | 2 | garuso         | 114   |
|     |              |      |         |   | Lilleen        | 26    |
| 33D | Sommersted   | 343  | 88714   | 1 | altidsur       | 50    |
| 34B | Vojens       | 2628 | 1542668 | 1 | vojen          | 28    |
| 34D | Vojens       | 6421 | 4832796 | 3 | heid-like      | 53    |
|     |              |      |         |   | Halfdan        | 12122 |
|     |              |      |         |   | mellemsur      | 3786  |
| 35A | Årøsund      | 3839 | 397068  | 2 | nepoznato      | 120   |
|     |              |      |         |   | Jahat          | 428   |
| 35B | Årøsund      | 4312 | 319707  | 2 | muut           | 158   |
|     |              |      |         |   | aaroes         | 165   |
| 35D | Årøsund      | 2896 | 268470  | 1 | kaaroe         | 110   |
| 36B | Ejby Mølle   | 125  | 105836  | 1 | ime            | 255   |
| 37A | Bogense      | 2633 | 240834  | 1 | humlepung-like | 998   |
| 37D | Bogense      | 4130 | 749600  | 1 | heid           | 888   |
| 38B | Hofmangav    | 3405 | 214442  | 1 | heid-like      | 53    |
|     |              |      |         |   | nomo           | 102   |
| 38D | Hofmangav    | 1160 | 263338  | 2 | momo           | 114   |
| 39A | Hårselv      | 4968 | 428445  | 1 | fjerdosal-like | 404   |
| 39B | Hårselv      | 99   | 149737  | 2 | sortkaff       | 52    |
|     |              |      |         |   | haarsle-like   | 100   |
| 39D | Hårselv      | 1557 | 195211  | 1 | ityhuna        | 22    |
| 40A | Odense NV    | 214  | 64473   | 1 | Sortsne        | 75    |
| 40D | Odense NV    | 340  | 102911  | 1 | glasur         | 20    |
| 41B | Odense NØ    | 3033 | 1057676 | 1 | arall          | 48    |
| 41D | Odense NØ    | 1708 | 193172  | 1 | skuden         | 998   |
| 42C | Otterup      | 847  | 167020  | 1 | adrainh-like   | 53    |
| 43B | Søndersø     | 157  | 157168  | 1 | teqsoen        | 70    |
| 43C | Søndersø     | 153  | 34251   | 1 | Lilleto        | 56    |
| 43D | Søndersø     | 338  | 146898  | 3 | lilleto-like   | 226   |
|     |              |      |         |   | sortregn       | 145   |
|     |              |      |         |   | welsh          | 213   |
| 44B | Ålborg V     | 2368 | 1352388 | 3 | lilleto-like   | 1006  |
|     |              |      |         |   | aalborv        | 877   |
|     |              |      |         |   | aldrigsur      | 525   |
| 44C | Ålborg V     | 2293 | 1992256 | 1 | inoa           | 52    |
| 44D | Ålborg V     | 4873 | 1197754 | 1 | flopper        | 86    |
| 45A | Ålborg Ø     | 4454 | 985167  | 1 | nazwa          | 255   |
| 45C | Ålborg Ø     | 1215 | 1870976 | 4 | haarsle        | 244   |
|     |              |      |         |   | tonn           | 354   |
|     |              |      |         |   | nieznany       | 166   |
|     |              |      |         |   | lillemer       | 1066  |
| 45D | Ålborg Ø     | 4109 | 1842928 | 2 | inny           | 717   |

|     |              |      |         |   |                |      |
|-----|--------------|------|---------|---|----------------|------|
| 46A | Marselisborg | 6441 | 91540   | 1 | pangalan-like  | 255  |
| 46B | Marselisborg | 6440 | 1073152 | 1 | pinkbiff       | 686  |
| 46C | Marselisborg | 5689 | 737432  | 1 | tunzavis       | 959  |
| 46D | Marselisborg | 5655 | 794015  | 1 | fjerdasal      | 404  |
| 47A | Egå          | 2532 | 846912  | 2 | tuinn          | 83   |
|     |              |      |         |   | egaa           | 210  |
|     |              |      |         |   | dhaeg          | 336  |
| 47B | Egå          | 7018 | 938687  | 1 | andreotti      | 998  |
| 47C | Egå          | 1531 | 801644  | 1 | dhaeg-like     | 311  |
| 47D | Egå          | 5278 | 717643  | 1 | nataliec       | 404  |
| 48A | Viby         | 4859 | 1290861 | 3 | nepoznato-like | 153  |
|     |              |      |         |   | tonnikala      | 1556 |
|     |              |      |         |   | magaca         | 57   |
| 48C | Viby         | 3106 | 1292261 | 2 | nataliec-like  | 404  |
|     |              |      |         |   | kvi            | 59   |
| 48D | Viby         | 5957 | 1063300 | 3 | pangalan-like  | 255  |
|     |              |      |         |   | forsur         | 155  |
|     |              |      |         |   | nepoznato-like | 64   |
| 48B | Viby         | 3194 | 916618  | 1 | adrainh        | 686  |

<sup>1</sup>Phage genomes with >95% nucleotide similarity to other phage genomes in the dataset are named after these, e.g. the felixounavirus identified in sample 42C has >95% nucleotide sequence similarity with the felixounavirus adrainh and is consequently named adrainh-like. The “-like” phage genomes are so far not deposited in public databases.

**Table S2** list of Auxiliary Metabolism Genes (AMGs) identified in the 104 unique wastewater Escherichia phages by a VIBRANT search. Including predicted function, KO numbers and counts.

| Gene                    | Protein                                             | KO number | Function in bacteriophages                                                | Count | phages with this gene                                                                                                           |
|-------------------------|-----------------------------------------------------|-----------|---------------------------------------------------------------------------|-------|---------------------------------------------------------------------------------------------------------------------------------|
| <i>rmlC</i>             | dTDP-4-dehydrorhamnose 3,5-epimerase                | K01790    | dt dp rhamnose biosynthesis                                               | 10    | <i>Cluster VI and VII</i>                                                                                                       |
| <i>rmlA</i>             | glucose-1-phosphate thymidyltransferase             | K00973    | dt dp rhamnose biosynthesis                                               | 8     | <i>Cluster VII</i> , ukendt and tuntematon                                                                                      |
| <i>rmlB</i>             | dTDP-glucose 4,6-dehydratase                        | K01710    | dt dp rhamnose biosynthesis                                               | 8     | <i>Cluster VII</i> , ukendt and tuntematon                                                                                      |
| <i>rmlD</i>             | dTDP-4-dehydrorhamnose reductase                    | K00067    | dt dp rhamnose biosynthesis                                               | 10    | <i>Cluster VI and VII</i>                                                                                                       |
| <i>dcm</i>              | DNA (cytosine-5)-methyltransferase                  | K17398    | DNA modification                                                          | 5     | <i>Cluster VII</i>                                                                                                              |
| NAM<br>PT               | nicotinamide phosphoribosyltransferase              | K03462    | unknown                                                                   | 25    | <i>Felixounavirus</i> , <i>Suspivirus</i> and <i>Cluster VII</i>                                                                |
| <i>mec</i>              | CysO sulfur-carrier protein]-S-L-cysteine hydrolase | K21140    | tail fiber protein                                                        | 20    | <i>Hannivervirus</i> and unclassified <i>Tunavirinae</i>                                                                        |
| <i>folA</i>             | dihydrofolate reductase                             | K00287    | de novo synthesis of pyrimidines, thymidylc acid, and certain amino acids | 33    | <i>Felixounavirus</i> , <i>Suspivirus</i> , <i>Krischvirus</i> , <i>Dhakavirus</i> , <i>Mosigvirus</i> and <i>Tequatrovirus</i> |
| <i>aroA</i><br><i>G</i> | 3-deoxy-7-phosphoheptulonate synthase               | K01626    | unknown                                                                   | 3     | Three of the four <i>Mosigvirus</i>                                                                                             |
| <i>AUP1</i>             | UDP-N-acetylglucosamine diphosphorylase             | K23144    | DNA modification                                                          | 4     | <i>Mosigvirus</i>                                                                                                               |
| <i>KdsD</i>             | arabinose-5-phosphate isomerase                     | K06041    | DNA modification                                                          | 4     | <i>Mosigvirus</i>                                                                                                               |
| <i>dcm</i>              | DNA (cytosine-5)-methyltransferase                  | K00558    | DNA modification                                                          | 1     | Pangalan                                                                                                                        |
| <i>queC</i>             | 7-cyano-7-deazaguanine synthase                     | K06920    | DNA modification                                                          | 1     | Skure                                                                                                                           |
| <i>queE</i>             | 7-carboxy-7-deazaguanine synthase                   | K10026    | DNA modification                                                          | 1     | Skure                                                                                                                           |
| <i>folE</i>             | GTP cyclohydrolase                                  | K01495    | DNA modification                                                          | 1     | Skure                                                                                                                           |
| <i>queD</i>             | 6-carboxy-5,6,7,8-tetrahydropterin synthase         | K01737    | DNA modification                                                          | 1     | Skure                                                                                                                           |

**Table S3** Rarefaction and extrapolation of the coliphage (n=136) dataset using iNEXT in RStudio. Code: `m <- c(1, 100, 250, 500, 1000)`, `iNEXT(dataset, datatype = "incidence_raw", size = m)`.

```

$NextEst: diversity estimates with rarefied and extrapolated samples.
      t      method order      qD qD.LCL qD.UCL      SC SC.LCL SC.UCL
1      1 interpolated      0  1.483  1.233  1.733 0.008  0.004  0.013
2     88 interpolated      0 100.101  86.238 113.965 0.394  0.298  0.490
4     90 extrapolated      0 101.895  87.790 116.000 0.399  0.302  0.496
6    250 extrapolated      0 205.565 168.282 242.849 0.696  0.554  0.837
8   1000 extrapolated      0 307.553 190.873 424.233 0.987  0.957  1.000

$AsyEst: asymptotic diversity estimates along with related statistics.
              Observed Estimator Est_s.e. 95% Lower 95% Upper
Species Richness  101.000   311.936   73.498   209.647   510.530
Shannon diversity   90.192   266.865   42.640   183.293   350.437
Simpson diversity   76.421   178.112   34.531   110.432   245.793

```

**Table S4** List of reads in samples with *Microviridae* phages and percentage of reads mapping to *Microviridae* phage genomes and the E. coli K-12 MG1655 host reference genome NC\_000913.

| Sample | Phages<br>per<br>sample<br>(n) | Microviridae<br>phage | Total<br>reads | Reads<br>mapping to<br>Microviridae<br>(n) | Reads<br>mapping to<br>Microviridae<br>(%) | Reads<br>mapping<br>to<br>MG1655<br>(n) | Reads<br>mapping<br>to<br>MG1655<br>(%) |
|--------|--------------------------------|-----------------------|----------------|--------------------------------------------|--------------------------------------------|-----------------------------------------|-----------------------------------------|
| 11B    | 2                              | Lilleven              | 417724         | 35613                                      | 8.53                                       | 163123                                  | 39.05                                   |
| 12D    | 2                              | Lilleput              | 436506         | 10558                                      | 2.42                                       | 131734                                  | 30.18                                   |
| 25C    | 2                              | Lilledu               | 571338         | 3048                                       | 0.53                                       | 15801                                   | 2.77                                    |
| 33A    | 1                              | Lilleen               | 34918          | 1058                                       | 3.03                                       | 3336                                    | 9.55                                    |
| 43C    | 1                              | Lilleto               | 34251          | 2361                                       | 6.66                                       | 3685                                    | 10.39                                   |
| 45C    | 4                              | lillemer              | 2159874        | 50988                                      | 2.36                                       | 721646                                  | 33.41                                   |

**Table S5** List sequence data assessed for matches with the 104 coliphage genomes.

| Source                                                                                             | (n) | Reference                                                                                                                                                                                                                                                          |
|----------------------------------------------------------------------------------------------------|-----|--------------------------------------------------------------------------------------------------------------------------------------------------------------------------------------------------------------------------------------------------------------------|
| The Global Sewage Project:<br>Inlet wastewater<br>metagenomes                                      | 235 | Hendriksen RS, Munk P, Njage P, et al (2019) Global monitoring of antimicrobial resistance based on metagenomics analyses of urban sewage. Nat Commun 10:1–12. <a href="https://doi.org/10.1038/s41467-019-08853-3">https://doi.org/10.1038/s41467-019-08853-3</a> |
| Danish wastewater libraries<br>from a Sewage surveillance<br>study                                 | 64  | BioProject: PRJEB13832                                                                                                                                                                                                                                             |
| Danish pig-gut metagenomes                                                                         | 96  | Xiao L, Estellé J, Kiilerich P, et al (2016) A reference gene catalogue of the pig gut microbiome. Nat Microbiol 1:1–6. <a href="https://doi.org/10.1038/nmicrobiol.2016.161">https://doi.org/10.1038/nmicrobiol.2016.161</a>                                      |
| Human gut metagenomes<br>from Danish subjects                                                      | 115 | Li J, Wang J, Jia H, et al (2014) An integrated catalog of reference genes in the human gut microbiome. Nat Biotechnol 32:834–841. <a href="https://doi.org/10.1038/nbt.2942">https://doi.org/10.1038/nbt.2942</a>                                                 |
| Sequencing runs from fecal<br>samples of ten healthy adults<br>from Cork, Ireland                  | 235 | Shkoporov AN, Clooney AG, Sutton TDS, et al (2019) The Human Gut Virome Is Highly Diverse, Stable, and Individual Specific. Cell Host Microbe 26:527–541.e5. <a href="https://doi.org/10.1016/j.chom.2019.09.009">https://doi.org/10.1016/j.chom.2019.09.009</a>   |
| Sequencing runs from a<br>Chinese study of metaviromes<br>from humans, mammals, birds<br>and water | 38  | Wang H, Ling Y, Shan T, et al (2019) Gut virome of mammals and birds reveals high genetic diversity of the family Microviridae. Virus Evol 5:1–8. <a href="https://doi.org/10.1093/ve/vez013">https://doi.org/10.1093/ve/vez013</a>                                |

|                                                   |         |                                                                                                                                                                                                                                                        |
|---------------------------------------------------|---------|--------------------------------------------------------------------------------------------------------------------------------------------------------------------------------------------------------------------------------------------------------|
| IMG/VR database: Uncultured viral genomes (UVIGs) | 735 106 | Paez-Espino D, Chen IMA, Palaniappan K, et al (2017) IMG/VR: A database of cultured and uncultured DNA viruses and retroviruses. Nucleic Acids Res 45:D457–D465. <a href="https://doi.org/10.1093/nar/gkw1030">https://doi.org/10.1093/nar/gkw1030</a> |
| IMG/VR database: Isolated virus genomes (iVGs)    | 8392    | Paez-Espino D, Chen IMA, Palaniappan K, et al (2017) IMG/VR: A database of cultured and uncultured DNA viruses and retroviruses. Nucleic Acids Res 45:D457–D465. <a href="https://doi.org/10.1093/nar/gkw1030">https://doi.org/10.1093/nar/gkw1030</a> |

**Table S6** Mapped reads from the Wang *et al.*, (2019) study and the IMG/VR database microbiomes. SEPARATE FILE

**Table S7** Blast results for the 104 coliphage genomes against the IMG/VR and GVD databases. SEPARATE FILE
